# Supplementary material for: Heparan sulfate proteoglycans undergo differential expression alterations in left sided colorectal cancer, depending on their metastatic character
Source: Springer Nature journal article supplement (doi:10.1186/s12885-018-4597-x), 2018-06-25
Supplement: MOESM1 [file 15878342]

Table S1. Antibodies and dilution used.

| <b>Antigen</b>           | <b>Species of origin</b> | <b>Dilution</b> | <b>Supplier</b>          |
|--------------------------|--------------------------|-----------------|--------------------------|
| <b>C6ST-1 (H-110)</b>    | Rabbit                   | 1:50            | Santa Cruz Biotechnology |
| <b>CD117</b>             | Rabbit                   | 1:500           | Dakocytomation           |
| <b>ColXVIII</b>          | Mouse                    | 1:100           | Thermoscientific         |
| <b>CS (Clone CS-56)</b>  | Mouse                    | 1:100           | Sigma-Aldrich Corp       |
| <b>CS4ST2</b>            | Goat                     | 1:100           | Santa Cruz Biotechnology |
| <b>Glypican -4</b>       | Rabbit                   | 1:100           | Thermo Scientific        |
| <b>HS (10E4 epitope)</b> | Mouse                    | 1:50            | amsbio                   |
| <b>HS2ST1 (Z-23)</b>     | Rabbit                   | 1: 100          | Santa Cruz Biotechnology |
| <b>NDST1</b>             | Mouse                    | 1:50            | Santa Cruz Biotechnology |
| <b>Perlecan</b>          | Rabbit                   | 1:100           | Santa Cruz Biotechnology |
| <b>Sydecn1 (CD138)</b>   | Mouse                    | 1:25            | Dakocytomation           |
| <b>UST</b>               | Rabbit                   | 1:100           | Thermoscientific         |
