# Supplementary material for: Heparan sulfate proteoglycans undergo differential expression alterations in left sided colorectal cancer, depending on their metastatic character
Source: Springer Nature journal article supplement (doi:10.1186/s12885-018-4597-x), 2018-06-25
Supplement: MOESM2 [file 15878342]

Table S2. Overall survival analysis

|                                |            | Median OS  | P value      |
|--------------------------------|------------|------------|--------------|
| <b>Global (all LCRC cases)</b> |            | 57,670     |              |
| <b>Node Status</b>             | pN0        | 51,400     | NS           |
|                                | pN1        | 62,870     |              |
| <b>GPC6 underexpression</b>    | No         | 37,330     | ,077<br>,076 |
|                                |            | <i>pN0</i> |              |
|                                | <i>pN1</i> | 37,330     |              |
|                                | Yes        | 68,100     |              |
|                                |            | <i>pN0</i> |              |
|                                | <i>pN1</i> | 68,100     |              |
| <b>NDST1 underexpression</b>   | No         | 50,000     | ,035<br>,047 |
|                                |            | <i>pN0</i> |              |
|                                | <i>pN1</i> | 50,000     |              |
|                                | Yes        | 68,100     |              |
|                                |            | <i>pN0</i> |              |
|                                | <i>pN1</i> | 68,100     |              |
| <b>HS6ST1 underexpression</b>  | No         | 51,400     | ,068<br>NS   |
|                                |            | <i>pN0</i> |              |
|                                | <i>pN1</i> | 50,000     |              |
|                                | Yes        | 79,470     |              |
|                                |            | <i>pN0</i> |              |
|                                | <i>pN1</i> | 68,100     |              |
| <b>CHST12 underexpression</b>  | No         | 12,300     | ,026<br>,042 |
|                                |            | <i>pN0</i> |              |
|                                | <i>pN1</i> | 37,330     |              |
|                                | Yes        | 68,100     |              |
|                                |            | <i>pN0</i> |              |
|                                | <i>pN1</i> | 68,100     |              |

OS: Overall survival

NS: No statistical difference
