# Supplementary material for: Heparan sulfate proteoglycans undergo differential expression alterations in left sided colorectal cancer, depending on their metastatic character
Source: Springer Nature journal article supplement (doi:10.1186/s12885-018-4597-x), 2018-06-25

Figure S3. Overall survival in genes displaying statistically significant differences.

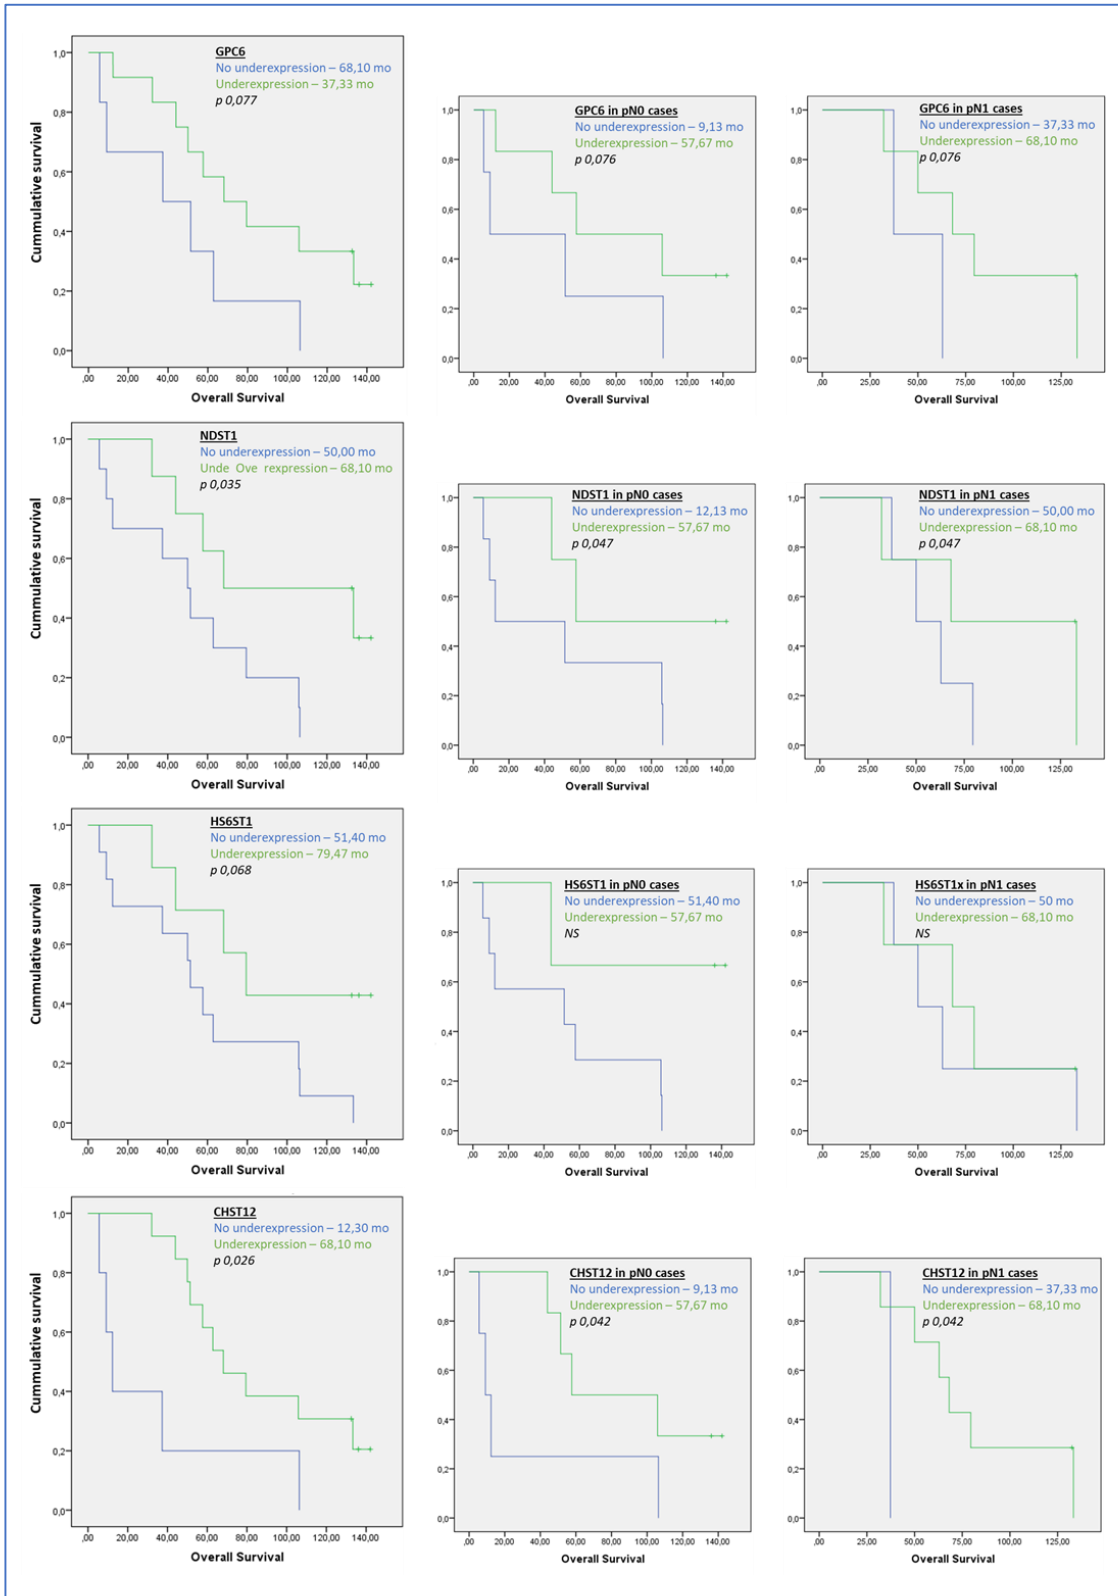

Supplement: MOESM3 [file 15878342]
